# Supplementary material for: Storm impacts on phytoplankton community dynamics in lakes
Source: PubMed Central journal article supplement (PMC7216882; doi:10.1111/gcb.15033), 2020-03-05
Supplement: GCB-26-2756-s002.pdf [file GCB-26-2756-s002.pdf]

**CONTENT OF PDF (needs to be coded for all of your assigned references)**

**Is this study about storm effects on phytoplankton in lakes/reservoirs/ponds? .....**

Checkmarking this box indicates that the *primary focus* was *storms*. This study can be observational, experimental, or a model.

**If NO, is it relevant for other reasons? .....**

(e.g., effects of wind or rain but not necessarily extreme events, compared effects across a range of wind/rain intensities, discusses storm events, or is a review paper, editorial comment)

**Note.** If both boxes above are left empty, then this indicates that the study is not relevant, or does not contain relevant information, to our systematic review. For example, non-relevant publications include studies about marine systems, estuaries, or streams.

**STORM INFORMATION**

**Was 'storm' defined? [ NO = , if YES then copy/paste text description below ]**

**Was the word 'storm' used in the publication? .....**

Use 'find' to search within text, but ignore uses in reference section.

**In some studies, storms effects are not measured but only discussed. In what context were storms discussed in this study? copy/paste context and/or numerical thresholds**

**EXPERIMENTAL STUDY ATTRIBUTES**

**What was manipulated? .....** [ ]

**What was the response variable? .....** [ ]

NOTE. If there are many, separate with commas.

**Comments about study?**

**MODEL STUDY ATTRIBUTES**

**What was manipulated? .....** [ ]

**What was the response variable? .....** [ ]

NOTE. If there are many, separate with commas.

**Comments about study?**

**NOTES/COMMENTS**

**(optional) Was there anything of note about this study that was not covered by the coding form? Add notes/comments below...**

# STUDY MEASURES

## MEASUREMENT CLASS

**Note.** If there are multiple sampling frequencies reported, then code the dominant or most abundant frequency. Fill 'other' below when the study reports a sampling frequency that is not available among the dropdown options.

### WEATHER . . . . .

- wind . . . . . [sampling freq. = , other = ]
- rain . . . . . [sampling freq. = , other = ]
- other . . . . . [sampling freq. = , other = ]
- other . . . . . [sampling freq. = , other = ]
- other . . . . . [sampling freq. = , other = ]

### LAKE PHYSICS . . . . .

- water temperature . . . . . [sampling freq. = , other = ]
- mixing/stratification . . . . . [sampling freq. = , other = ]
- light . . . . . [sampling freq. = , other = ]
- other . . . . . [sampling freq. = , other = ]
- other . . . . . [sampling freq. = , other = ]
- other . . . . . [sampling freq. = , other = ]

### CHEMISTRY . . . . .

- nutrient loading . . . . . [sampling freq. = , other = ]  
(e.g., concentrations in nutrient measured in the water; covers both internal/external nutrient loading)
- sediment loading . . . . . [sampling freq. = , other = ]  
(e.g., sediment coming in from the watershed [via rivers], or sediment disturbed from lake bottom)
- other . . . . . [sampling freq. = , other = ]
- other . . . . . [sampling freq. = , other = ]
- other . . . . . [sampling freq. = , other = ]

### PHYTOPLANKTON . . . . .

- diversity. . . . . [sampling freq. = , other = ]  
(e.g., richness, taxonomy, Shannon index)
- composition . . . . . [sampling freq. = , other = ]  
(e.g., abundance, dominance)
- total abundance or biovolume/biomass . . . . . [sampling freq. = , other = ]
- growth rate . . . . . [sampling freq. = , other = ]
- chlorophyll . . . . . [sampling freq. = , other = ]
- physiology . . . . . [sampling freq. = , other = ]
- metabolism . . . . . [sampling freq. = , other = ]  
(e.g., primary production, respiration using oxygen differences)
- other . . . . . [sampling freq. = , other = ]
- other . . . . . [sampling freq. = , other = ]
- other . . . . . [sampling freq. = , other = ]

- OTHER 1 . . . . . [sampling freq. = , other = ]
- OTHER 2 . . . . . [sampling freq. = , other = ]
- OTHER 3 . . . . . [sampling freq. = , other = ]
- OTHER 4 . . . . . [sampling freq. = , other = ]
- OTHER 5 . . . . . [sampling freq. = , other = ]
